# Supplementary material for: Transcriptomics Analysis of the Toxicological Impact of Enrofloxacin in an Aquatic Environment on the Chinese Mitten Crab (Eriocheir sinensis)
Source: MDPI journal article supplement (doi:10.3390/ijerph20031836), 2023-01-19
Supplement: s1 [file s1]

| Database                           | Number of Unigenes | Percentage |
|------------------------------------|--------------------|------------|
| Annotated in NR                    | 24604              | 25.62      |
| Annotated in NT                    | 17269              | 17.98      |
| Annotated in KO                    | 9251               | 9.63       |
| Annotated in SwissProt             | 14294              | 14.88      |
| Annotated in PFAM                  | 26542              | 27.64      |
| Annotated in GO                    | 26538              | 27.64      |
| Annotated in KOG                   | 7494               | 7.8        |
| Annotated in all Databases         | 2785               | 2.9        |
| Annotated in at least one Database | 44144              | 45.98      |
| Total Unigenes                     | 96003              | 100        |

**Table S1.** Statistics of gene annotation success rate. NR, NCBI non-redundant protein sequences; NT, NCBI nucleotide sequences; KO, kyoto encyclopedia of genes and genomes orthology; PFAM, Protein family; GO, Gene Ontology; KOG, clusters of orthologous groups for eukaryotic complete genomes.
